# Supplementary material for: A bio-based benzoxazine surfactant from amino acids
Source: Royal Society of Chemistry journal article supplement (doi:10.1039/d0gc00218f), 2020-01-01
Supplement: d0gc00218f1.pdf [file d0gc00218f1.pdf]

## A bio-based benzoxazine surfactant from amino acids

Zheng Wang,<sup>a</sup> Shu Yao,<sup>b</sup> Kun Song,<sup>b</sup> Xinjian Gong,<sup>a</sup> Sujuan Zhang,<sup>a</sup> Sheng Gao<sup>a</sup> and Zaijun Lu<sup>\*a</sup>

<sup>a</sup>Key Laboratory for Special Functional Aggregated Materials of Ministry of Education, School of Chemistry and Chemical Engineering, Shandong University, Jinan, 250100, P. R. China

<sup>b</sup>Department of Obstetrics and Gynecology, Qilu Hospital, Shandong University, Jinan, 250100, P. R. China

\*Corresponding author

E-mail: z.lu@sdu.edu.cn; Fax: +86 531 88564464; Tel: +86 531 88361599

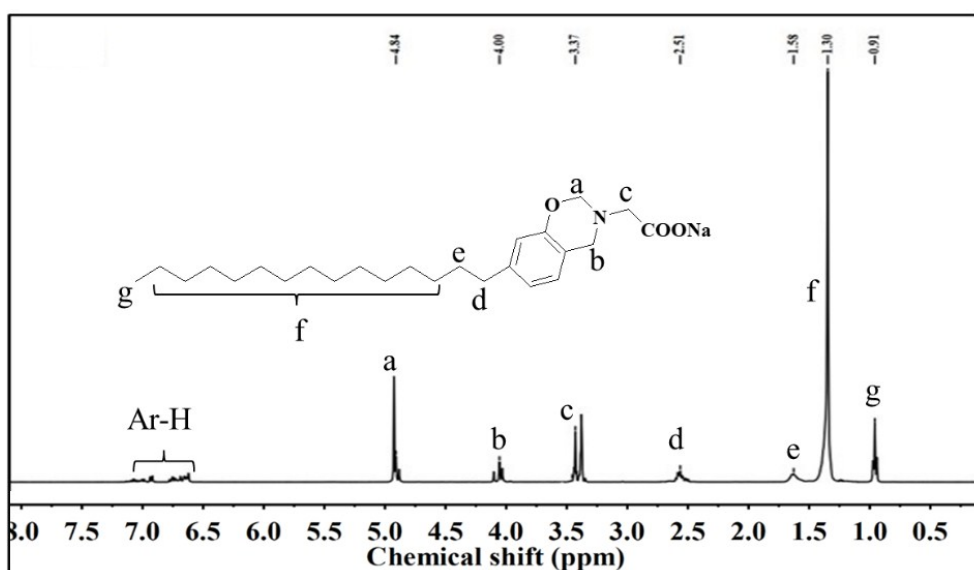

Fig. S1 <sup>1</sup>H NMR spectrum of Pe-g

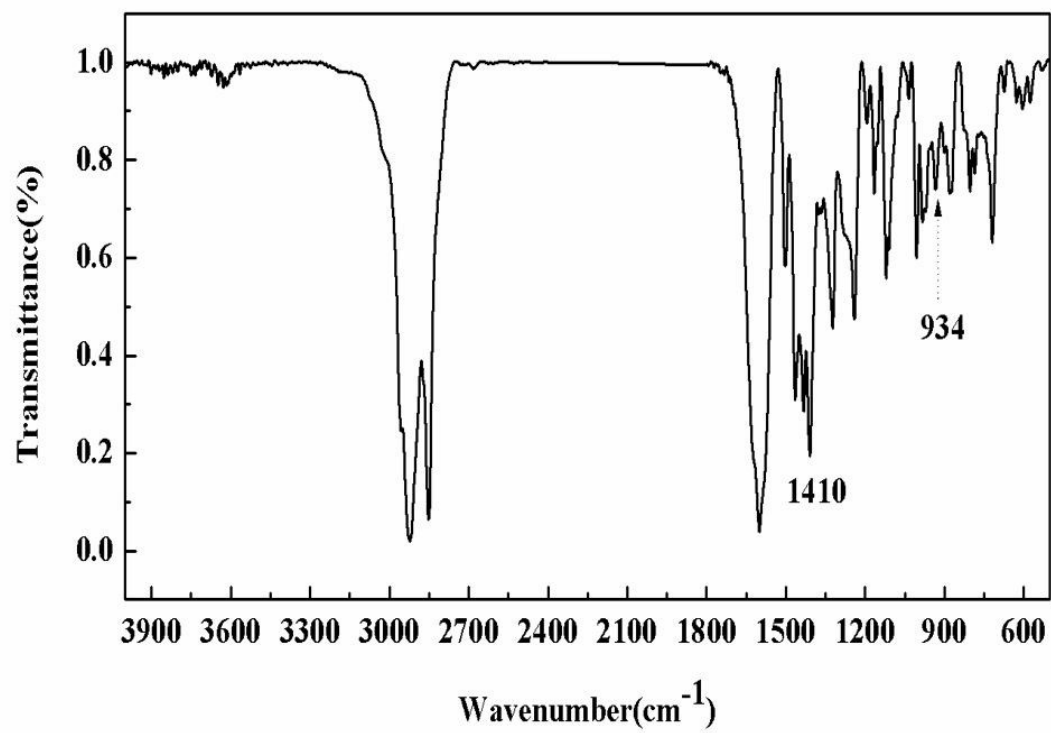

Fig. S2 FT-IR spectrum of Pe-g
